# Supplementary material
Source: Royal Society of Chemistry journal article supplement (doi:10.1039/d6cy00204h)
Supplement: d6cy00204h1.pdf [file d6cy00204h1.pdf]

## **Steering C–C Bond Cleavage and Hydrogenation in Polystyrene Hydrocracking through External Brønsted Acid Sites over Ni/Zeolites**

Jonghyun Park <sup>1,‡</sup>, Taeun Kwon <sup>1,‡</sup>, Ki Hyuk Kang <sup>2</sup>, Wangyun Won <sup>1,\*</sup>, Insoo Ro <sup>1,\*</sup>

<sup>1</sup> *Department of Chemical and Biological Engineering, Korea University, Seoul 02841, Republic of Korea*

<sup>2</sup> *Chemical & Process Technology Division, Korea Research Institute of Chemical Technology (KRICT), Daejeon 34114, Republic of Korea*

<sup>‡</sup> *These authors contributed equally.*

*\*Corresponding Author:*

*Prof. I. Ro ([insooro@korea.ac.kr](mailto:insooro@korea.ac.kr))*

**Table S1.** Comparison of PS hydrocracking reactivity over acidic, non-acidic, and non-catalytic conditions.

| Catalyst                          | Gas (wt%) | LOHC (wt%) | Liquid (wt%) | Solid residue (wt%) | Cyclic LOHCs / (aromatic+ cyclic LOHCs) | Hydrogen consumption (mmol) | Mass balance (%) |
|-----------------------------------|-----------|------------|--------------|---------------------|-----------------------------------------|-----------------------------|------------------|
| Ni/HY (30)                        | 0.55      | 21.80      | 24.91        | 38.52               | 86.1                                    | 26.29                       | 82.51            |
| Ni/SiO <sub>2</sub>               | 0.02      | 0.33       | 0.00         | 96.71               | 91.99                                   | 23.98                       | 92.16            |
| Ni/Al <sub>2</sub> O <sub>3</sub> | 0.03      | 0.33       | 10.57        | 90.91               | 98.02                                   | 19.07                       | 96.35            |
| Ni/TiO <sub>2</sub>               | 0.21      | 2.47       | 0.28         | 91.73               | 38.22                                   | 11.87                       | 93.30            |
| Blank <sup>a</sup>                | 0.01      | 0.69       | 1.61         | 90.44               | 1.14                                    | 5.79                        | 91.43            |

Reaction conditions: 300 °C, 6 h, 5% N<sub>2</sub>/H<sub>2</sub>, 3 MPa (at 25 °C), 0.1 g of catalyst, 1.0 g of PS (*M<sub>w</sub>*: ~192,000). <sup>a</sup> No catalyst.

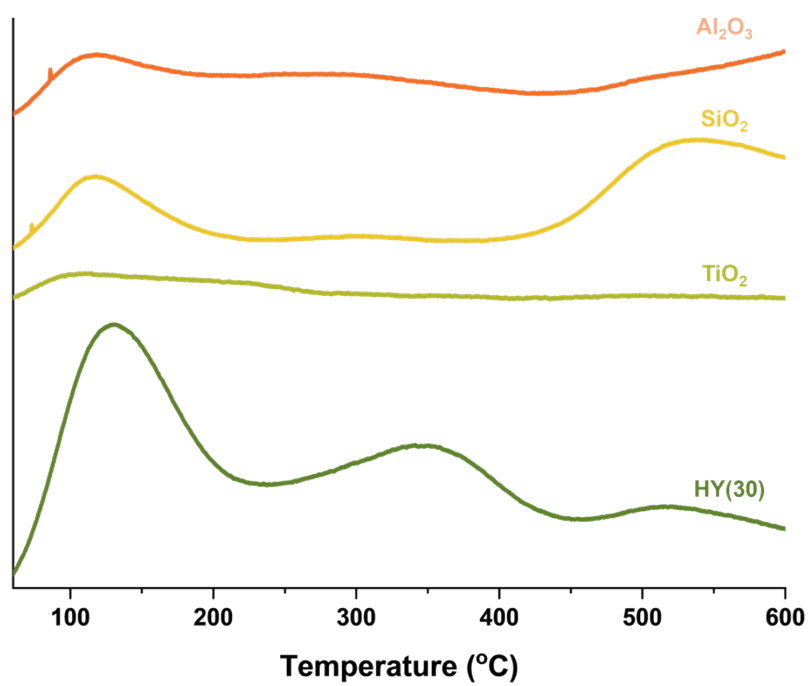

**Figure S1.** NH<sub>3</sub>-TPD profile of Al<sub>2</sub>O<sub>3</sub>, SiO<sub>2</sub>, TiO<sub>2</sub>, and HY(30).

**Table S2.** Catalytic characterization results of different Ni/zeolite catalysts.

| Catalyst                          | $S_{\text{BET}}$<br>( $\text{m}^2\cdot\text{g}^{-1}$ ) | $S_{\text{mic}}$<br>( $\text{m}^2\cdot\text{g}^{-1}$ ) | $S_{\text{ext}}$<br>( $\text{m}^2\cdot\text{g}^{-1}$ ) | Acid sites density <sup>a</sup><br>( $\text{mmol}\cdot\text{g}^{-1}$ ) |                |                |                | <sup>a</sup><br>Acid<br>site<br>dens<br>ity<br>was<br>deter<br>mine<br>d by<br>$\text{NH}_3$<br>-<br>TPD<br>of<br>the<br>corr |
|-----------------------------------|--------------------------------------------------------|--------------------------------------------------------|--------------------------------------------------------|------------------------------------------------------------------------|----------------|----------------|----------------|-------------------------------------------------------------------------------------------------------------------------------|
|                                   |                                                        |                                                        |                                                        | $A_{\text{T}}$                                                         | $A_{\text{W}}$ | $A_{\text{M}}$ | $A_{\text{S}}$ |                                                                                                                               |
| Ni/HY(30)                         | 981.7                                                  | 924.3                                                  | 57.4                                                   | 1.147                                                                  | 0.572          | 0.430          | 0.145          | deter<br>mine<br>d by<br>$\text{NH}_3$                                                                                        |
| Ni/SiO <sub>2</sub>               | 267.9                                                  | 1.67                                                   | 266.3                                                  | 0.583                                                                  | 0.125          | 0.000          | 0.458          | -                                                                                                                             |
| Ni/Al <sub>2</sub> O <sub>3</sub> | 67.7                                                   | -                                                      | 67.7                                                   | 0.446                                                                  | 0.238          | 0.000          | 0.208          | TPD<br>of<br>the<br>corr                                                                                                      |
| Ni/TiO <sub>2</sub>               | 30.0                                                   | -                                                      | 30.0                                                   | 0.145                                                                  | 0.088          | 0.014          | 0.043          |                                                                                                                               |

esponding parent (metal-free) zeolites and was separated into  $A_{\text{T}}$ ,  $A_{\text{W}}$ ,  $A_{\text{M}}$  and  $A_{\text{S}}$  corresponding to the total, weak, medium, and strong acid sites, respectively.

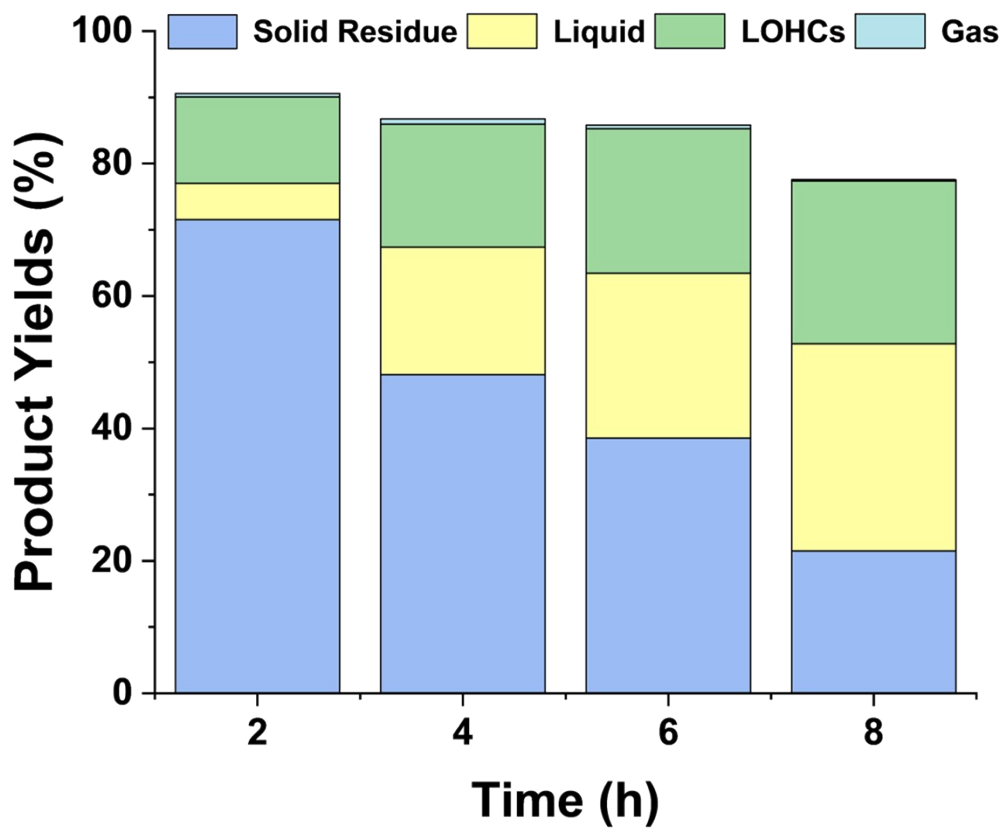

**Figure S2.** PS hydrocracking reaction results as a function of reaction time. Reaction conditions: 300 °C, 5% N<sub>2</sub>/H<sub>2</sub>, 3 MPa (at 25 °C), 0.1 g of Ni/HY(30), 1.0 g of PS ( $M_w$ : ~192,000).

**Table S3.** Effect of time, temperature and pressure on PS hydrocracking reactivity over Ni/HY(30) catalysts.

| Reaction Condition | Gas (wt% <sup>a</sup> ) | LOHC (wt%) | Liquid (wt%) | Solid residue (wt%) | Cyclic LOHCs / (aromatic + cyclic LOHCs) | Hydrogen consumption (mmol) | Mass balance (%) |
|--------------------|-------------------------|------------|--------------|---------------------|------------------------------------------|-----------------------------|------------------|
| 280 °C             | 1.67                    | 14.6       | 0.79         | 75.48               | 93.2                                     | 20.2                        | 87.96            |
| 320 °C             | 0.55                    | 21.8       | 24.92        | 38.52               | 68.3                                     | 25.2                        | 75.76            |
| 340 °C             | 1.28                    | 26.8       | 25.39        | 21.47               | 61.9                                     | 28.4                        | 70.84            |
| 2 h                | 0.53                    | 13.0       | 5.45         | 71.55               | 67.3                                     | 17.8                        | 88.05            |
| 4 h                | 0.81                    | 18.6       | 19.26        | 48.12               | 76.7                                     | 13.0                        | 85.37            |
| 8 h                | 0.55                    | 24.6       | 31.31        | 38.52               | 81.3                                     | 27.1                        | 82.52            |
| 16 h               | 1.15                    | 23.0       | 29.6         | 14.93               | 85.7                                     | 32.9                        | 66.15            |
| 0.5 MPa            | 0.05                    | 10.2       | 3.88         | 68.65               | 16.4                                     | 4.8                         | 82.00            |
| 1 MPa              | 1.03                    | 14.4       | 3.94         | 69.27               | 26.7                                     | 6.4                         | 85.22            |
| 2 MPa              | 1.55                    | 19.3       | 14.15        | 53.3                | 48.2                                     | 12.7                        | 85.16            |
| 4 MPa              | 1.90                    | 25.7       | 40.42        | 16.26               | 89.0                                     | 39.0                        | 80.77            |

Unless otherwise noted, the reaction conditions were as follows: 300 °C, 6 h, 5% N<sub>2</sub>/H<sub>2</sub>, 3 MPa (at 25 °C), 0.1 g of Ni/HY(30), 1.0 g of PS (*M<sub>w</sub>*: ~192,000).

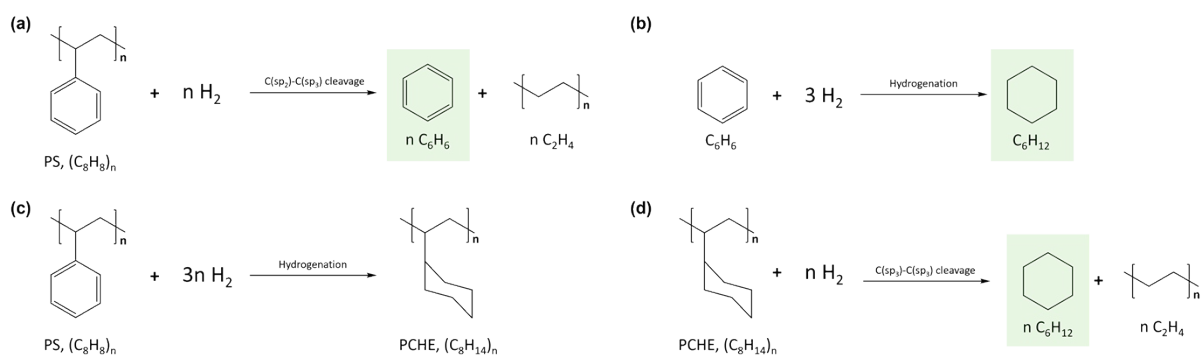

**Figure S3.** Schematic representation of possible formation pathways for major  $\text{C}_6$  products from PS. (a)  $\text{C(sp}^2\text{)-C(sp}^3\text{)}$  bond cleavage of PS. (b) Hydrogenation of benzene to cyclohexane. (c) Hydrogenation of PS to PCHE. (d)  $\text{C(sp}^3\text{)-C(sp}^3\text{)}$  bond cleavage of PCHE.

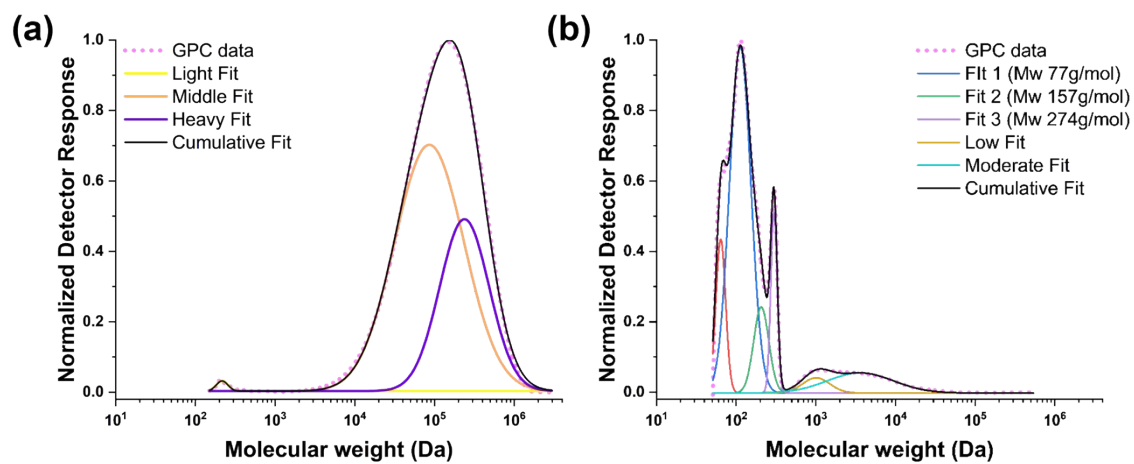

**Figure S4.** GPC molecular weight distributions of (a) pristine PS feed and (b) products obtained after PS hydrocracking over Ni/HY(30) under 300 °C, 4 MPa H<sub>2</sub>, and 6 h.

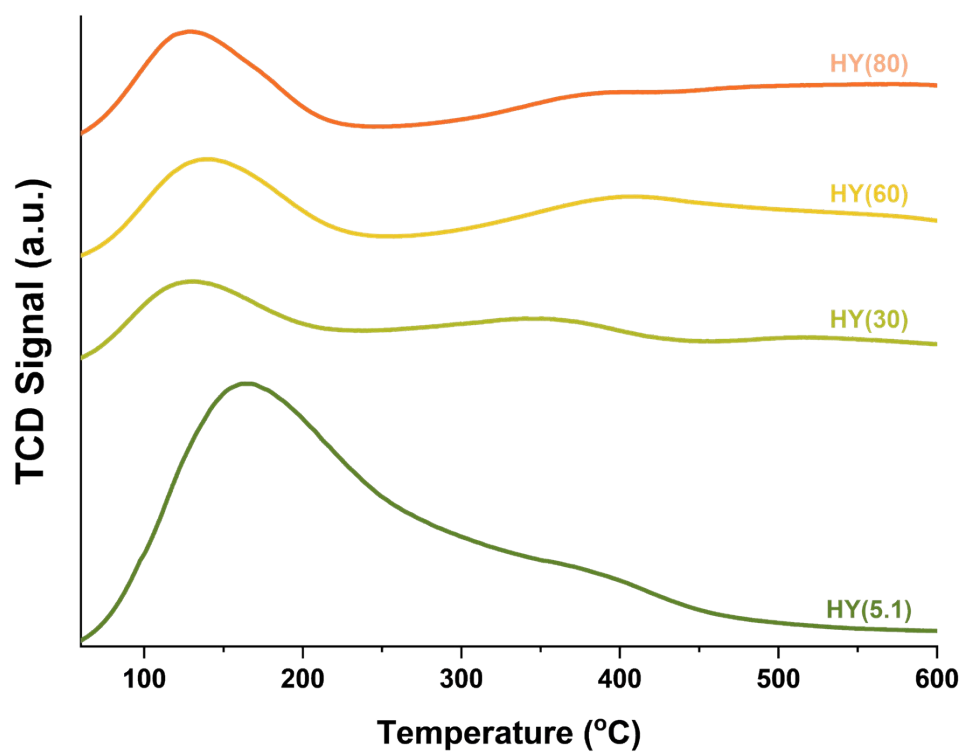

**Figure S5.** NH<sub>3</sub>-TPD profile of HY zeolite with different SiO<sub>2</sub>/Al<sub>2</sub>O<sub>3</sub> ratios.

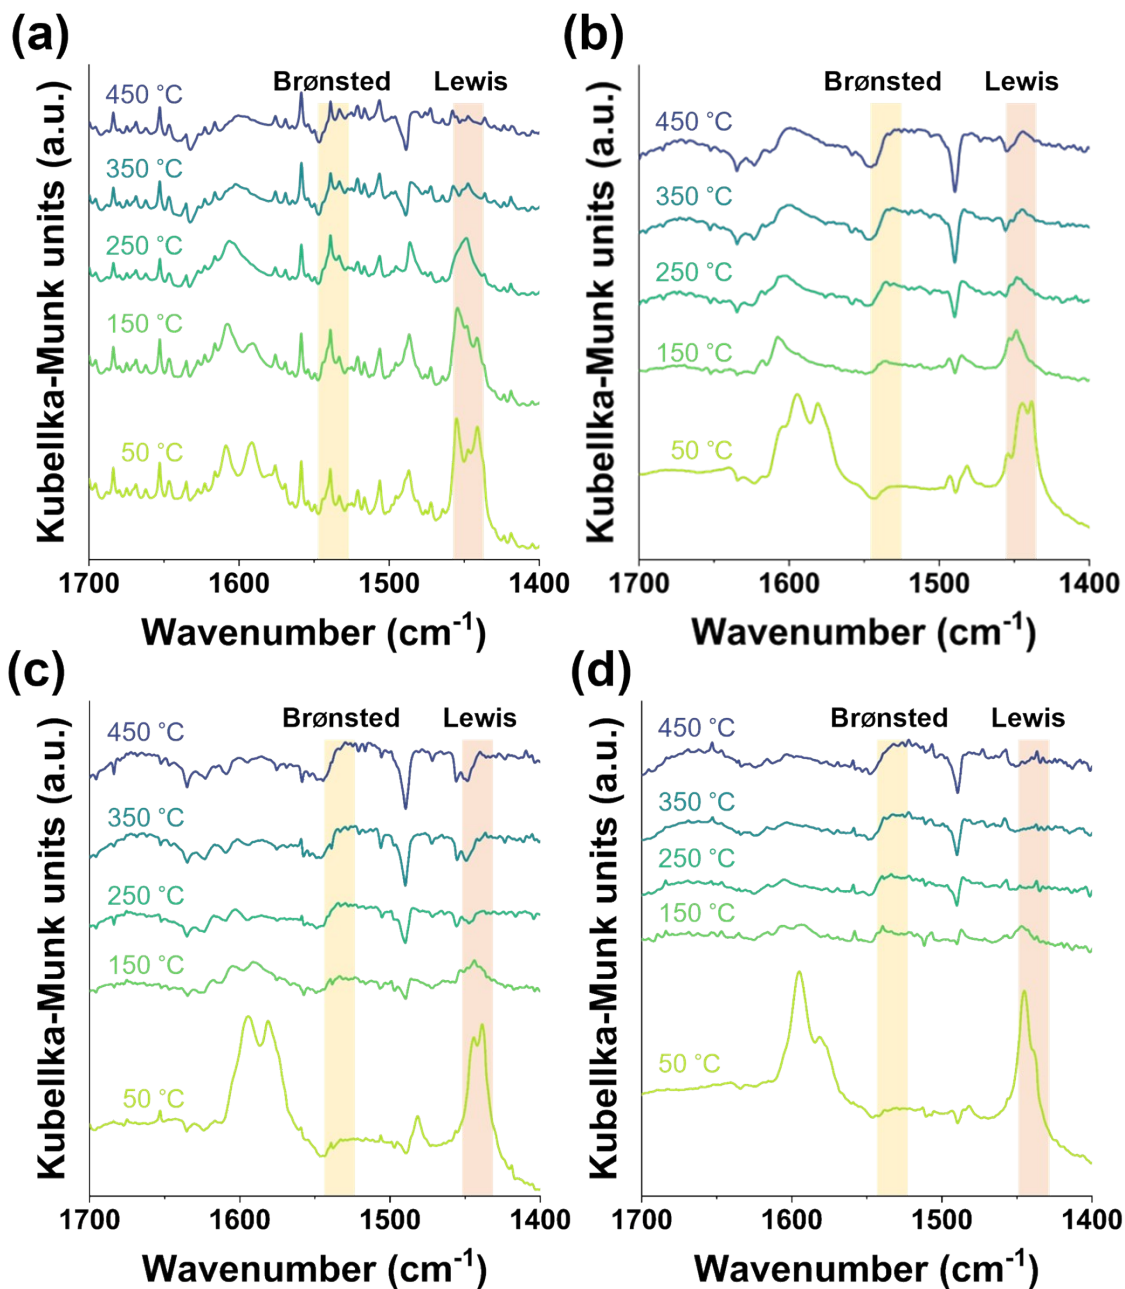

**Figure S6.** Pyridine-DRIFTS spectra of HY zeolite with different  $\text{SiO}_2/\text{Al}_2\text{O}_3$  ratios. (a) Ni/HY(5.1), (b) Ni/HY(30), (c) Ni/HY(60) and (d) Ni/HY(80).

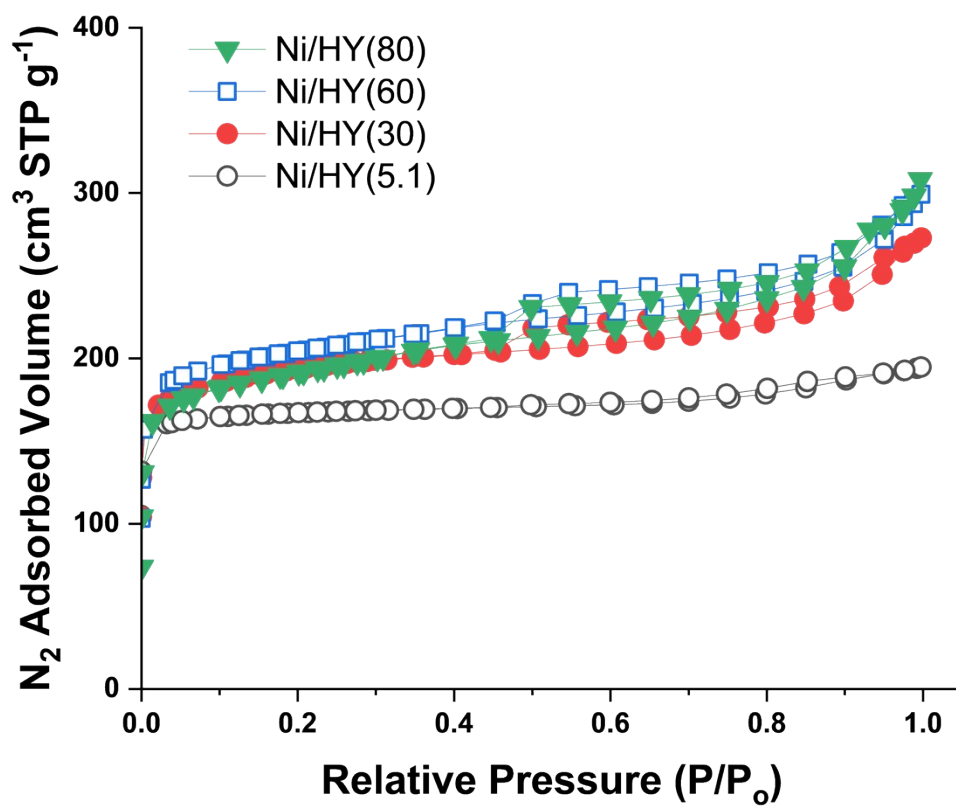

**Figure S7.** N<sub>2</sub> adsorption-desorption isotherms of HY zeolite with different SiO<sub>2</sub>/Al<sub>2</sub>O<sub>3</sub> ratios.

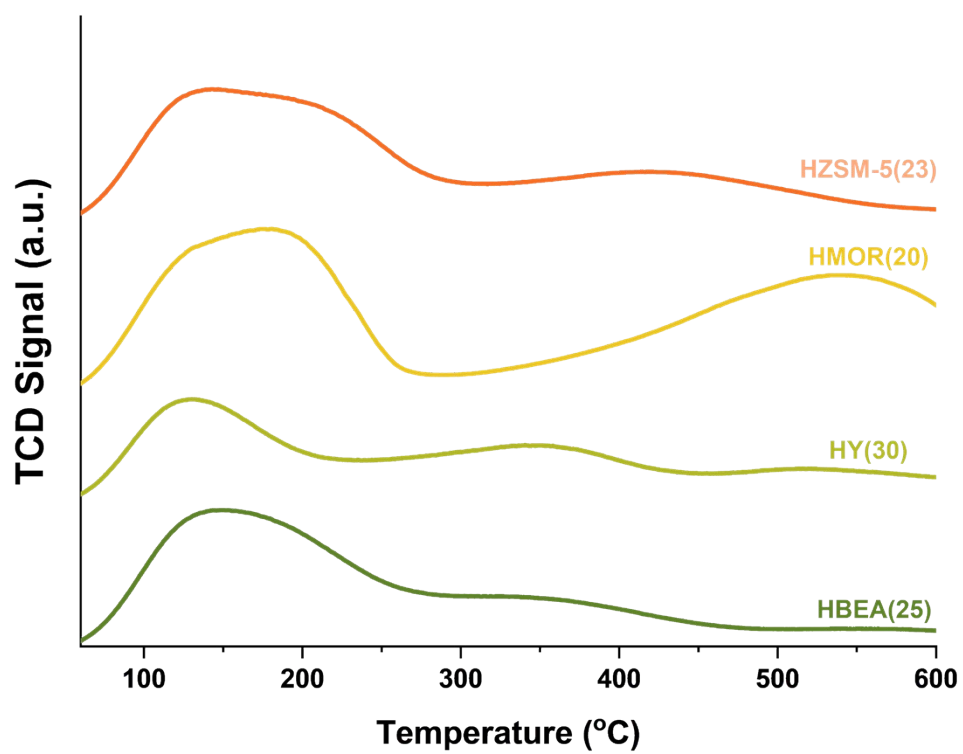

**Figure S8.** NH<sub>3</sub>-TPD profile of different zeolites.

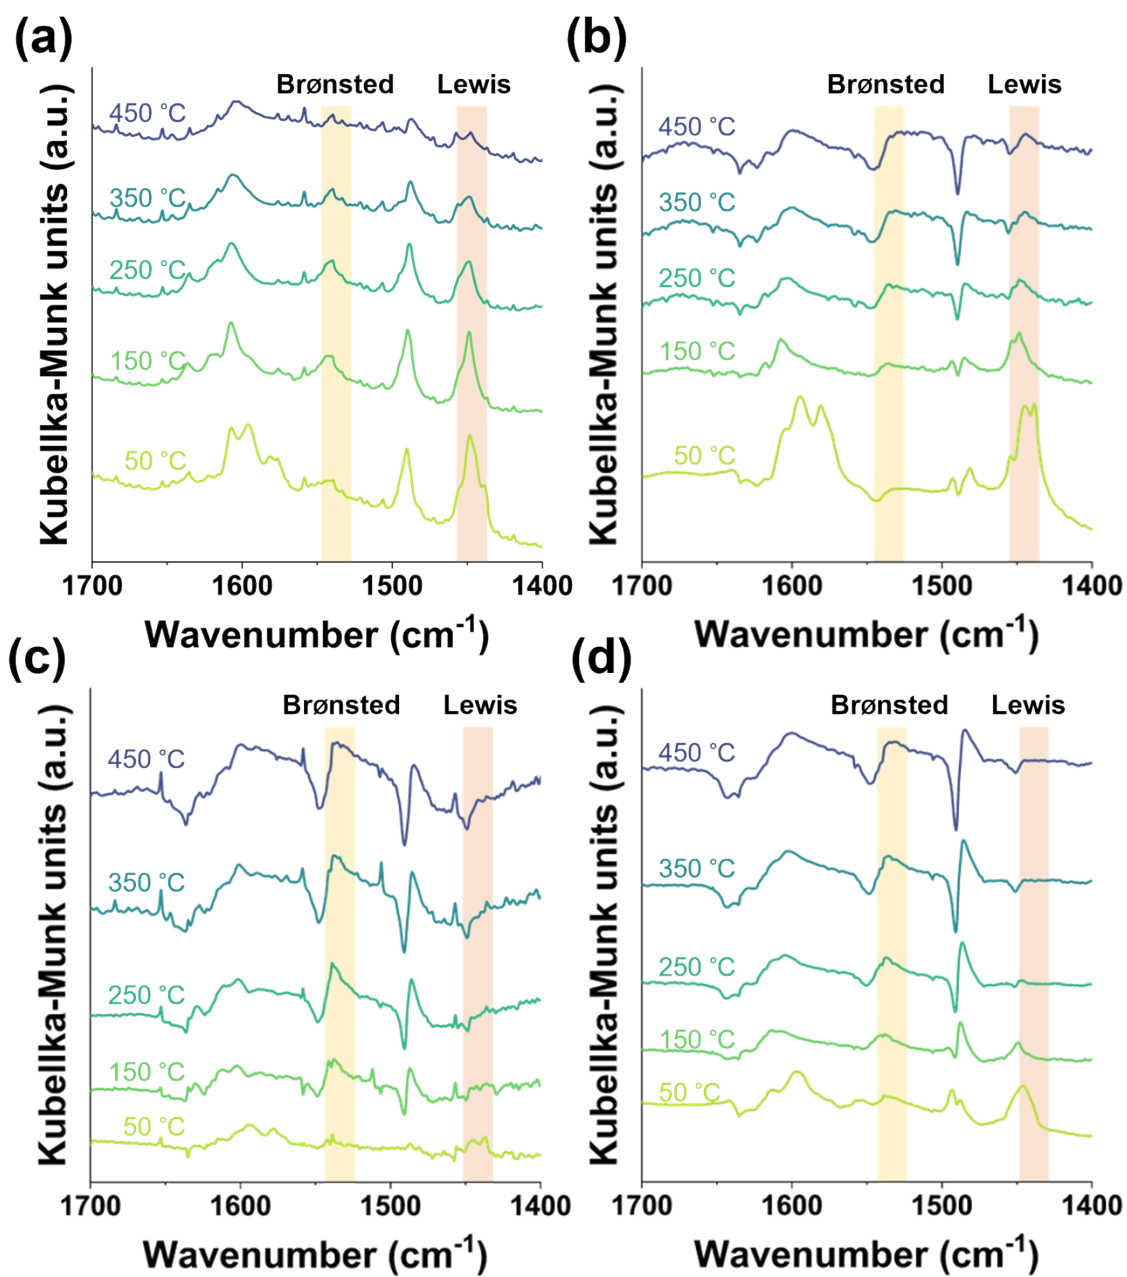

**Figure S9.** Pyridine-DRIFTS spectra of different zeolites. (a) Ni/HBEA(25), (b) Ni/HY(30), (c) Ni/HMOR(20) and (d) Ni/HZSM-5(23).

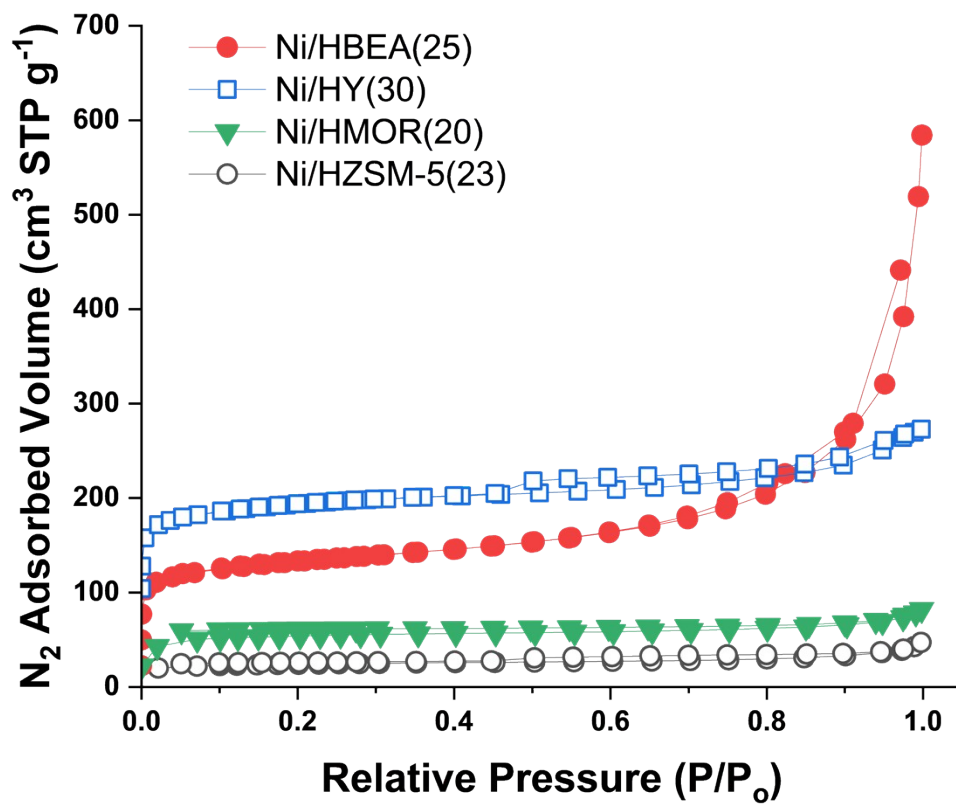

Figure S10.  $N_2$  adsorption-desorption isotherms of different zeolites.

**Table S4.** Effect of PS hydrocracking over Ni catalysts with different acid properties

| Catalyst           | Gas (wt%) | LOHC (wt%) | Liquid (wt%) | Solid residue (wt%) | Cyclic LOHCs / (aromatic+ cyclic LOHCs) | Hydrogen consumption (mmol) | Mass balance (%) |
|--------------------|-----------|------------|--------------|---------------------|-----------------------------------------|-----------------------------|------------------|
| Ni/HY(5.1)         | 2.00      | 4.22       | 3.24         | 85.53               | 70.3                                    | 21.6                        | 93.62            |
| Ni/HY(60)          | 2.65      | 17.04      | 17.43        | 52.75               | 95.8                                    | 22.6                        | 88.04            |
| Ni/HY(80)          | 0.25      | 12.32      | 9.94         | 66.98               | 92.4                                    | 18.4                        | 86.53            |
| Ni/HBEA(25)        | 0.37      | 25.04      | 45.39        | 8.87                | 88.81                                   | 33.6                        | 75.44            |
| Ni/HMOR(20)        | 0.29      | 12.14      | 13.68        | 54.61               | 37.80                                   | 12.3                        | 80.85            |
| Ni/HZSM-5(23)      | 5.85      | 5.91       | 0.00         | 80.82               | 16.06                                   | 20.9                        | 80.79            |
| Ni/HY(30)-pyridine | 0.02      | 0.57       | 0.00         | 87.42               | 85.22                                   | 9.0                         | 96.43            |
| Ni/HY(30)-DTBP     | 0.00      | 0.63       | 0.00         | 98.99               | 88.47                                   | 5.7                         | 93.58            |

Reaction conditions: 300 °C, 6 h, 5% N<sub>2</sub>/H<sub>2</sub>, 3 MPa (at 25 °C), 0.1 g of catalyst, 1.0 g of PS ( $M_w$ : ~192,000).

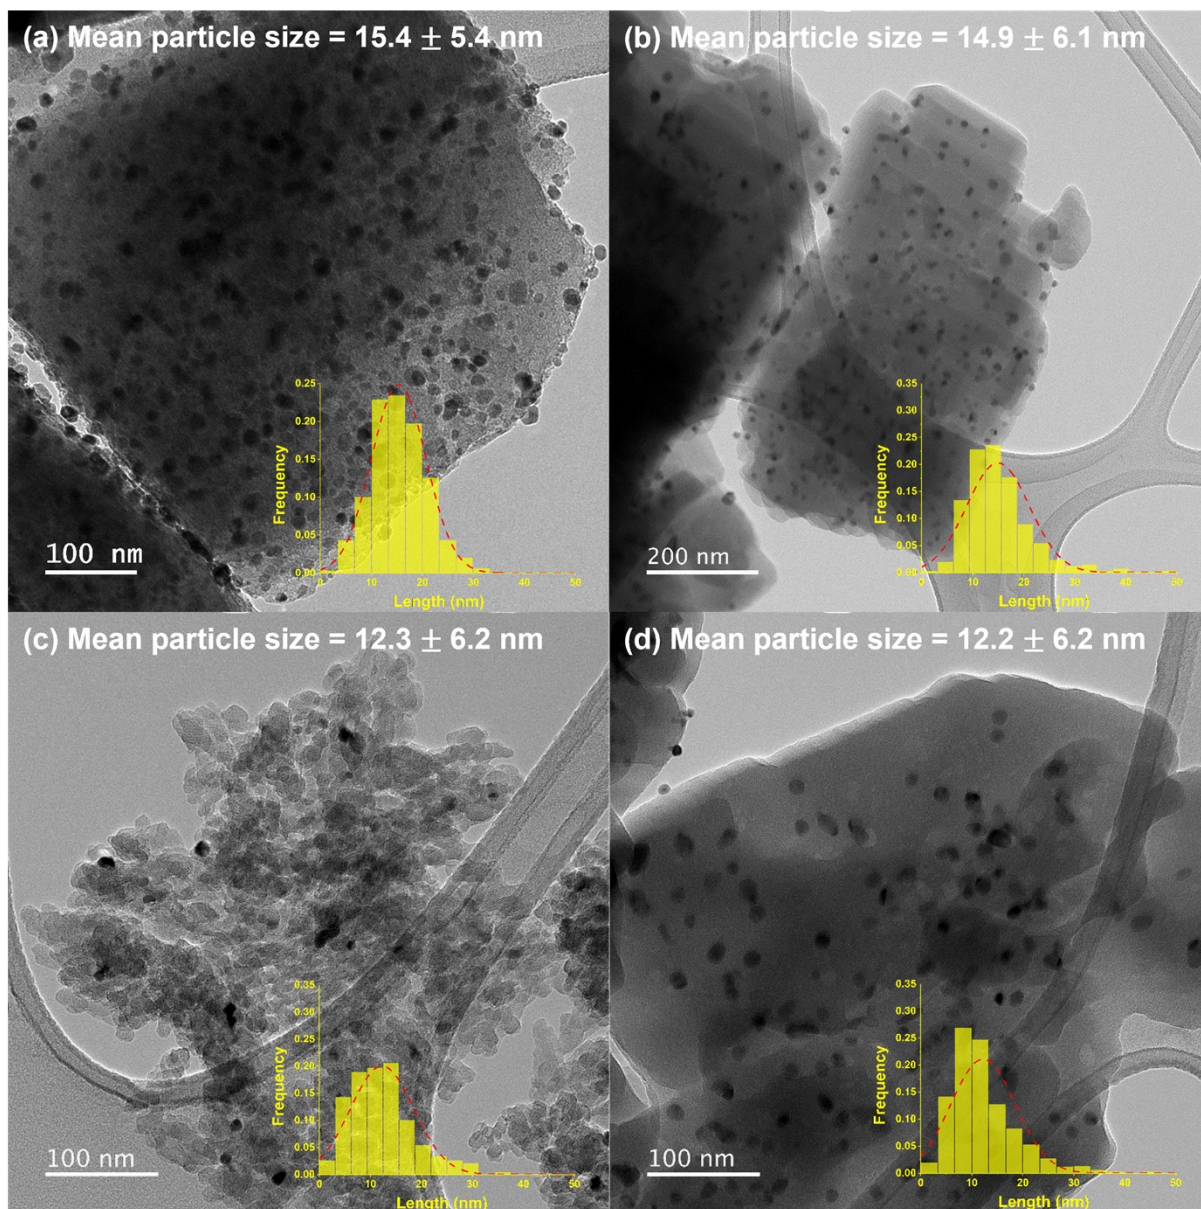

**Figure S11.** HRTEM images and corresponding particle size distribution histograms of (a) Ni/HY(30), (b) Ni/HZSM-5(23), (c) Ni/HBEA(25), and (d) Ni/HMOR(20).

**Table S5.** Crystallite size estimated from XRD analysis.

| Catalyst      | 2 $\theta$ range (°) | FWHM range  | Scherrer Crystallite size (nm) |
|---------------|----------------------|-------------|--------------------------------|
| Ni/HY(5.1)    | 23.0–23.9            | 0.128–0.146 | 59.4                           |
| Ni/HY(30)     | 23.1–24.0            | 0.135–0.147 | 57.5                           |
| Ni/HY(60)     | 23.2–24.0            | 0.141–0.147 | 56.5                           |
| Ni/HY(80)     | 23.2–24.0            | 0.140–0.180 | 51.4                           |
| Ni/HBEA(25)   | 22.4–27.0            | 0.320–0.660 | 18.8                           |
| Ni/HMOR(20)   | 22.4–25.7            | 0.160–0.160 | 51.8                           |
| Ni/HZSM-5(23) | 23.0–23.9            | 0.152–0.190 | 46.1                           |

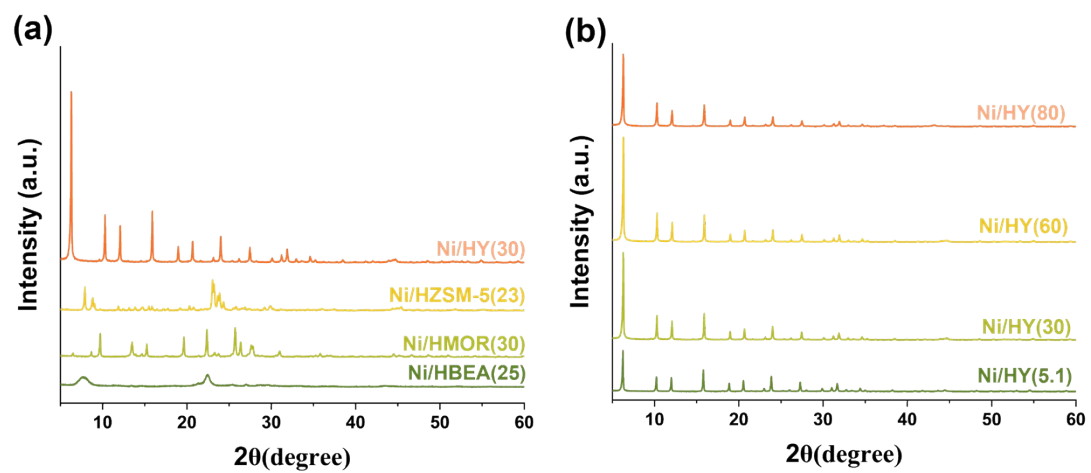

**Figure S12.** XRD patterns of (a) different zeolite catalysts and (b) catalysts with varying SiO<sub>2</sub>/Al<sub>2</sub>O<sub>3</sub> ratios.

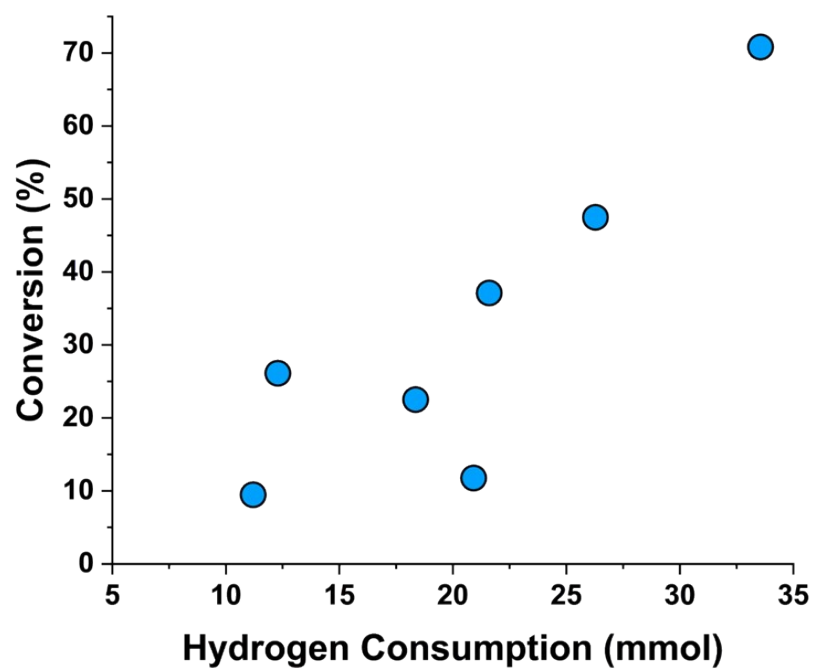

**Figure S13.** Correlation between PS conversion and hydrogen consumption amounts.
